# Supplementary material
Source: Springer Nature journal article supplement (https://www.springerprofessional.de/resource/supplementary/40192_2013_5018_MOESM12_ESM.pdf/11899496)
Supplement: MOESM12 [file 11899496]

threshold distance = 0

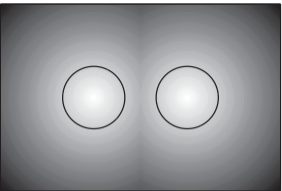

(a)

threshold distance = 3

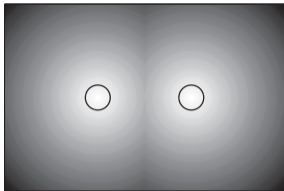

(b)

threshold distance = 5

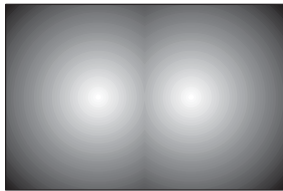

(c)

0  
-5  
-10  
-15

threshold distance = 0

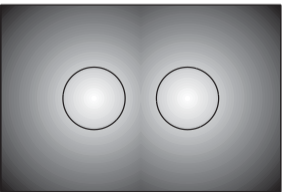

(d)

threshold distance = -2

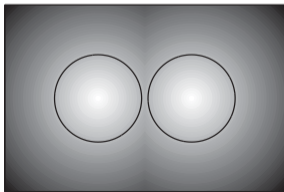

(e)

threshold distance = -3

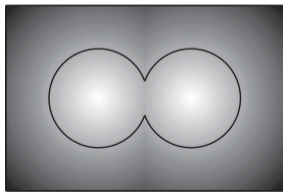

(f)

0  
-5  
-10  
-15
